# Supplementary material
Source: Research Square preprint supplement (doi:10.21203/rs.3.rs-9286518/v1)
Supplement: Supplementary file 1 [file b3d13bafd75bfe6951424ca1.pdf]

# Supplementary Information

## Spectral Moment Embedding: A canonical generalisation of Characteristic Response Analysis for covariance-based signal classification

*Supplementary Note: Full proofs of Theorems 1–5*

Jeet Bandhu Lahiri      Siddharth Panwar

School of Computing and Electrical Engineering,  
Indian Institute of Technology Mandi

### Notation and setup

Throughout,  $\mathbf{C} \in \mathcal{S}_+(N)$  denotes the regularised sample covariance,  $\mathbf{C} = \sum_{i=1}^N \lambda_i \mathbf{P}_i$  with  $\mathbf{P}_i = \mathbf{v}_i \mathbf{v}_i^\top$  the rank-1 spectral projectors,  $v_{ij}$  the  $j$ -th component of  $\mathbf{v}_i$ , and  $\mathcal{G}_N = \{-1, +1\}^N$  the sign-flip group acting on eigenvectors.

### Theorem 1: Factorisation through spectral projectors

**Theorem 1** (Factorisation). *Any polynomial  $\varphi : \mathcal{S}_+(N) \rightarrow \mathbb{R}$  that is well-defined on  $\mathbf{C}$  (independent of eigendecomposition choice) is a polynomial in the entries of  $\{\mathbf{C}^k\}_{k \geq 1}$ .*

*Proof.* Well-definedness imposes two invariance conditions.

**Step 1 ( $\mathcal{G}_N$ -invariance).** The group  $\mathcal{G}_N$  acts by independent sign-flips:  $\mathbf{v}_i \mapsto s_i \mathbf{v}_i$  leaves  $\mathbf{P}_i = (s_i \mathbf{v}_i)(s_i \mathbf{v}_i)^\top = \mathbf{P}_i$  and  $\mathbf{C}$  unchanged. A monomial  $\prod_{i,j} v_{ij}^{a_{ij}}$  transforms under  $\mathbf{s} = (s_1, \dots, s_N)$  as  $\prod_i s_i^{\sum_j a_{ij}} \cdot \prod_{i,j} v_{ij}^{a_{ij}}$ .

For invariance:  $s_i^{\sum_j a_{ij}} = 1$  for all  $s_i \in \{-1, +1\}$  requires  $\sum_j a_{ij}$  to be even for each  $i$ . Any monomial with even row-degree in every row  $i$  decomposes as products of quadratic factors  $v_{ij} v_{ij'} = P_i^{jj'}$  within each row. Hence the  $\mathcal{G}_N$ -invariant polynomial ring in  $\{v_{ij}\}$  is generated by  $\{P_i^{jj'} : 1 \leq i, j, j' \leq N\}$ , the entries of  $\mathbf{P}_i$ . Therefore  $\varphi$  is a polynomial in  $\{(\lambda_i, \mathbf{P}_i)\}_{i=1}^N$ .

**Step 2 (Permutation symmetry).** The labelling of eigenvectors is arbitrary: any permutation  $\sigma \in S_N$  sends  $(\lambda_i, \mathbf{P}_i) \mapsto (\lambda_{\sigma(i)}, \mathbf{P}_{\sigma(i)})$  while leaving  $\mathbf{C}$  unchanged. Hence  $\varphi$  must be symmetric in the atom pairs  $\{(\lambda_i, \mathbf{P}_i)\}$ .

**Step 3 (Expression in moments by induction).** The matrix moments satisfy  $(\mathbf{C}^k)_{jj'} = \sum_i \lambda_i^k P_i^{jj'}$ , so they are the multivariate power sums of the atoms. We show by induction on total degree  $d$  that every symmetric polynomial in  $\{(\lambda_i, \mathbf{P}_i)\}$  is a polynomial in  $\{(\mathbf{C}^k)_{jj'} : k \geq 1\}$ .

*Base  $d = 0$ :* Constants are trivially in the algebra.

*Inductive step:* Consider a symmetric monomial  $M = \frac{1}{|\text{Orb}|} \sum_{\sigma} \prod_i \lambda_{\sigma(i)}^{a_i} \prod_{j,j'} (P_{\sigma(i)}^{jj'})^{b_i^{jj'}}$ . Expanding the product  $\prod_{r=1}^R (\mathbf{C}^{k_r})_{j_r j_r'} = \prod_r (\sum_i \lambda_i^{k_r} P_i^{j_r j_r'})$  yields a sum over  $(i_1, \dots, i_R) \in$

$[N]^R$ . The *injective* part (all  $i_r$  distinct) gives exactly  $M$  (up to a combinatorial coefficient). The *collision* part (at least one repeated index) involves fewer than  $R$  distinct atoms and has strictly lower total degree in atom-count. By the inductive hypothesis, collision parts are already in  $\mathbb{R}[(\mathbf{C}^k)_{jj'}]$ . Rearranging therefore expresses  $M$  in the moment algebra.  $\square$

## Theorem 2: Generic injectivity

**Theorem 2** (Injectivity). *The map  $\Phi : \mathbf{C} \mapsto [\mathbf{I}, \mathbf{C}, \mathbf{C}^2, \dots, \mathbf{C}^{N-1}]$  is injective on the Zariski-open dense set  $\mathcal{U} = \{\mathbf{C} \in \mathcal{S}_+(N) : \lambda_i \neq \lambda_j \text{ for all } i \neq j\}$ .*

*Proof.* We show  $\Phi(\mathbf{C})$  uniquely determines  $\{\lambda_i\}$  and  $\{\mathbf{P}_i\}$ .

**Step 1 (Eigenvalues via Newton's identities).** The power sums  $p_k = \text{tr}(\mathbf{C}^k) = \sum_i \lambda_i^k$  for  $k = 1, \dots, N$  determine the elementary symmetric polynomials  $e_\ell$  via  $e_\ell = \frac{1}{\ell} \sum_{r=1}^{\ell} (-1)^{r-1} e_{\ell-r} p_r$ , with  $e_0 = 1$ . These are the coefficients of the characteristic polynomial  $\chi(\lambda) = \sum_{\ell=0}^N (-1)^\ell e_\ell \lambda^{N-\ell}$ , whose roots are  $\{\lambda_i\}$ . For  $\mathbf{C} \in \mathcal{U}$ , all roots are distinct, so  $\{\lambda_i\}$  is uniquely determined. The set  $\mathcal{S}_+(N) \setminus \mathcal{U}$  is the zero locus of  $\Delta = \prod_{i < j} (\lambda_i - \lambda_j)^2$ , a non-zero polynomial; hence  $\mathcal{U}$  is Zariski-open and dense.

**Step 2 (Projectors via Vandermonde inversion).** Fix any pair  $(j, j')$ . The  $N$  equations  $(\mathbf{C}^k)_{jj'} = \sum_i \lambda_i^k P_i^{jj'}$  for  $k = 0, \dots, N-1$  form the linear system  $\mathbf{W} \mathbf{p}^{(jj')} = \mathbf{c}^{(jj')}$ , where  $W_{ki} = \lambda_i^k$  is an  $N \times N$  Vandermonde matrix,  $\mathbf{p}^{(jj')} = (P_1^{jj'}, \dots, P_N^{jj'})^\top$ , and  $\mathbf{c}^{(jj')} = (\delta_{jj'}, (\mathbf{C})_{jj'}, (\mathbf{C}^2)_{jj'}, \dots, (\mathbf{C}^{N-1})_{jj'})^\top$  uses  $(\mathbf{C}^0)_{jj'} = \delta_{jj'}$ .

Since  $\det \mathbf{W} = \prod_{1 \leq i < i' \leq N} (\lambda_{i'} - \lambda_i) \neq 0$  for distinct eigenvalues, the system has the unique solution  $\mathbf{p}^{(jj')} = \mathbf{W}^{-1} \mathbf{c}^{(jj')}$ .

**Step 3 (Reconstruction).** Given  $\{\lambda_i\}$  and  $\{\mathbf{P}_i\}$ , we can recover  $\mathbf{C} = \sum_i \lambda_i \mathbf{P}_i$  exactly.  $\square$

## Theorem 3: POCR as a distorted upper bound

**Theorem 3** (POCR bound and non-injectivity). *With  $\text{POCR}_j = \sum_i \lambda_i |v_{ij}|$  and  $\text{SME}_j^{(1)} = (\mathbf{C})_{jj} = \sum_i \lambda_i v_{ij}^2$ :  $\text{POCR}_j(\mathbf{C})^2 \leq \text{tr}(\mathbf{C}) \cdot \text{SME}_j^{(1)}(\mathbf{C})$ , with equality iff all  $|v_{ij}|$  are equal. POCR is non-injective: there exist distinct  $\mathbf{C}, \mathbf{C}' \in \mathcal{S}_+(N)$  with  $\text{POCR}(\mathbf{C}) = \text{POCR}(\mathbf{C}')$ .*

*Proof. Part 1 (Cauchy-Schwarz).* Let  $\boldsymbol{\alpha} = (\sqrt{\lambda_i})$ ,  $\boldsymbol{\beta} = (\sqrt{\lambda_i} |v_{ij}|)$ . Then  $\text{POCR}_j^2 = \langle \boldsymbol{\alpha}, \boldsymbol{\beta} \rangle^2 \leq \|\boldsymbol{\alpha}\|^2 \|\boldsymbol{\beta}\|^2 = (\sum_i \lambda_i) (\sum_i \lambda_i v_{ij}^2) = \text{tr}(\mathbf{C}) \cdot (\mathbf{C})_{jj}$ . Equality holds iff  $\boldsymbol{\beta} = c \boldsymbol{\alpha}$ , i.e., all  $|v_{ij}| = c$ .

**Part 2 (Explicit non-injective pair).** Let  $N = 2$ ,  $\lambda_1 > \lambda_2 > 0$ ,  $c, s > 0$ ,  $c^2 + s^2 = 1$ ,  $c \neq s$ . Define  $\mathbf{v}_1 = (c, s)^\top$ ,  $\mathbf{v}_2 = (-s, c)^\top$  and  $\mathbf{v}'_1 = (c, -s)^\top$ ,  $\mathbf{v}'_2 = (s, c)^\top$ . Both pairs are orthonormal (verify:  $\mathbf{v}_1 \cdot \mathbf{v}_2 = 0$ ,  $\mathbf{v}'_1 \cdot \mathbf{v}'_2 = cs + (-s)c = 0$ ). Since  $|v_{ij}| = |v'_{ij}|$  for all  $i, j$ , POCR vectors coincide.

Direct computation yields:

$$\mathbf{C} = \begin{pmatrix} \lambda_1 c^2 + \lambda_2 s^2 & (\lambda_1 - \lambda_2) cs \\ (\lambda_1 - \lambda_2) cs & \lambda_1 s^2 + \lambda_2 c^2 \end{pmatrix}, \quad \mathbf{C}' = \begin{pmatrix} \lambda_1 c^2 + \lambda_2 s^2 & -(\lambda_1 - \lambda_2) cs \\ -(\lambda_1 - \lambda_2) cs & \lambda_1 s^2 + \lambda_2 c^2 \end{pmatrix}.$$

Since  $(\lambda_1 - \lambda_2) cs > 0$  we have  $\mathbf{C} \neq \mathbf{C}'$  (opposite off-diagonal signs). Note  $\mathbf{v}'_2 = (s, c) \neq \pm(-s, c) = \pm \mathbf{v}_2$  for  $c \neq s$ , confirming these are genuinely distinct matrices. Meanwhile  $\text{vech}(\mathbf{C}) \neq \text{vech}(\mathbf{C}')$  since  $C_{12} \neq C'_{12}$ , so  $\text{SME}_{\text{vech},1}$  separates them.  $\square$

## Theorem 4: Lipschitz stability

**Theorem 4** (Lipschitz continuity). For bounded  $\mathcal{B} \subset \mathcal{S}_+(N)$ ,  $M = \sup_{\mathcal{B}} \|\mathbf{C}\|_{\text{op}}$ , and projection  $P$  with norm  $\|P\|$ :  $\|\text{SME}_{P,p}(\mathbf{C}) - \text{SME}_{P,p}(\mathbf{C}')\| \leq \|P\| \left(\sum_{k=1}^p kM^{k-1}\right) \|\mathbf{C} - \mathbf{C}'\|_{\text{op}}$ .

*Proof.* **Step 1 (Telescoping identity).** For any square matrices  $\mathbf{A}, \mathbf{B}$ ,  $\mathbf{A}^k - \mathbf{B}^k = \sum_{r=0}^{k-1} \mathbf{A}^r (\mathbf{A} - \mathbf{B}) \mathbf{B}^{k-1-r}$ . This is proved by induction: the base case  $k = 1$  is  $\mathbf{A}^0 (\mathbf{A} - \mathbf{B}) \mathbf{B}^0 = \mathbf{A} - \mathbf{B}$ ; the inductive step uses  $\mathbf{A}^k - \mathbf{B}^k = \mathbf{A}(\mathbf{A}^{k-1} - \mathbf{B}^{k-1}) + (\mathbf{A} - \mathbf{B})\mathbf{B}^{k-1}$  and substitutes the inductive hypothesis for the first term.

**Step 2 (Norm bound).** Applying sub-multiplicativity to the telescoping sum with  $\mathbf{A} = \mathbf{C}$ ,  $\mathbf{B} = \mathbf{C}'$ :

$$\|\mathbf{C}^k - \mathbf{C}'^k\| \leq \sum_{r=0}^{k-1} M^r \|\mathbf{C} - \mathbf{C}'\| M^{k-1-r} = kM^{k-1} \|\mathbf{C} - \mathbf{C}'\|.$$

**Step 3 (Final combination).**

$$\|\text{SME}_{P,p}(\mathbf{C}) - \text{SME}_{P,p}(\mathbf{C}')\| \leq \sum_{k=1}^p \|P\| \|\mathbf{C}^k - \mathbf{C}'^k\| \leq \|P\| \left(\sum_{k=1}^p kM^{k-1}\right) \|\mathbf{C} - \mathbf{C}'\|.$$

Since  $M, p < \infty$ , the Lipschitz constant is finite.  $\square$

## Theorem 5: Approximation density

**Theorem 5** (Stone-Weierstrass density). The algebra  $\mathcal{A}$  of polynomials in  $\{(\mathbf{C}^k)_{jj'}\}_{k \geq 1}$  is uniformly dense in  $C(K)$  for any compact  $K \subset \mathcal{S}_+(N)$ .

*Proof.* We verify the three hypotheses of the Stone-Weierstrass theorem.

(i) *Constants.* The zero polynomial plus a constant belongs to  $\mathcal{A}$ .

(ii) *Closed under multiplication.* Products of polynomials in  $\{(\mathbf{C}^k)_{jj'}\}$  are again such polynomials.

(iii) *Separates points.* For any distinct  $\mathbf{C} \neq \mathbf{C}' \in K$ , there exist  $j, j'$  with  $C_{jj'} \neq C'_{jj'}$ . The function  $f : \mathbf{C} \mapsto (\mathbf{C}^1)_{jj'} = C_{jj'}$  belongs to  $\mathcal{A}$  and satisfies  $f(\mathbf{C}) \neq f(\mathbf{C}')$ . This holds for all  $\mathbf{C}, \mathbf{C}' \in K$  without any genericity condition.

By Stone-Weierstrass,  $\mathcal{A}$  is uniformly dense in  $C(K)$ .

*Interpretation:* Combined with Theorem 1 (every  $\mathcal{G}_N$ -invariant polynomial is in  $\mathcal{A}$ ), this means any continuous, well-defined function of the covariance spectrum and eigenvectors can be uniformly approximated by SME features. SME is therefore a universal covariance representation.  $\square$
